# Supplementary material for: Ethical issues in termination of resuscitation decision-making: an interview study with paramedics and relatives of out-of-hospital cardiac arrest non-survivors
Source: PubMed Central journal article supplement — BMJ Open. 2024 Nov 19;14(11):e085132. doi: 10.1136/bmjopen-2024-085132 (PMC11580266; doi:10.1136/bmjopen-2024-085132), 2024-11-19
Supplement: bmjopen-14-11-s001.pdf [file bmjopen-14-11-s001.pdf]

**Supplemental material: Coding framework**

| Code                        | Subcodes                                                                                                                                                                                                                                                                                                                                                                                                                                                                                                                                                                                                                                                                                                                                                                                                                                                                                                                                                                                                                                                                                                                                                                                                                                                                                                                                                 |
|-----------------------------|----------------------------------------------------------------------------------------------------------------------------------------------------------------------------------------------------------------------------------------------------------------------------------------------------------------------------------------------------------------------------------------------------------------------------------------------------------------------------------------------------------------------------------------------------------------------------------------------------------------------------------------------------------------------------------------------------------------------------------------------------------------------------------------------------------------------------------------------------------------------------------------------------------------------------------------------------------------------------------------------------------------------------------------------------------------------------------------------------------------------------------------------------------------------------------------------------------------------------------------------------------------------------------------------------------------------------------------------------------|
| Patient autonomy            | <ul style="list-style-type: none"> <li>● Patient wishes               <ul style="list-style-type: none"> <li>○ DNAR/ReSPECT</li> <li>○ Documentation required</li> <li>○ Informing treatment options</li> <li>○ Educating public about resus and DNARs</li> <li>○ Need to be established before an emergency</li> <li>○ Communication with family (asking relatives about patient wishes)</li> <li>○ Not communicated to paramedics</li> <li>○ Not always recognised or enacted</li> <li>○ Interpreted in context of event</li> </ul> </li> <li>● Family autonomy by proxy</li> <li>● Family involvement and patient wishes difficult to incorporate into guidelines</li> <li>● Conflict between patient wishes and paramedic guidelines</li> </ul>                                                                                                                                                                                                                                                                                                                                                                                                                                                                                                                                                                                                      |
| Preventing harm to patients | <ul style="list-style-type: none"> <li>● Guiding principles               <ul style="list-style-type: none"> <li>○ Saving life/protection from harm                   <ul style="list-style-type: none"> <li>▪ Making a safe decision</li> </ul> </li> <li>○ Preventing further harm / relieving suffering</li> </ul> </li> </ul>                                                                                                                                                                                                                                                                                                                                                                                                                                                                                                                                                                                                                                                                                                                                                                                                                                                                                                                                                                                                                        |
| Best interests              | <ul style="list-style-type: none"> <li>● Assumptions that inform best interests decision-making               <ul style="list-style-type: none"> <li>○ End of life care/final stages of terminal illness</li> <li>○ Quality of life before CA</li> <li>○ Quality of life if patient survives CA</li> <li>○ Relevance of age                   <ul style="list-style-type: none"> <li>▪ Physiological reserve</li> <li>▪ Independence</li> <li>▪ Paramedic's emotional response</li> <li>▪ Years left to live</li> <li>▪ Other assumptions</li> <li>▪ No influence</li> </ul> </li> <li>○ Ability to benefit                   <ul style="list-style-type: none"> <li>▪ Reversible cause</li> <li>▪ Shockable rhythm</li> <li>▪ Physiological reserve / comorbidities</li> <li>▪ Downtime with no CPR</li> <li>▪ Levels of independence</li> </ul> </li> </ul> </li> <li>● Values that inform best interests decision-making               <ul style="list-style-type: none"> <li>○ Good death</li> <li>○ Patient dignity</li> <li>○ Quality of life versus sanctity of life</li> <li>○ Treating everyone (patients) the same</li> <li>○ Acting for the benefit of the patient</li> <li>○ Weighing up                   <ul style="list-style-type: none"> <li>▪ Likelihood of reversing CA cause vs a difficult death</li> </ul> </li> </ul> </li> </ul> |

|                                 |                                                                                                                                                                                                                                                                                                                                                                                                                                                                                                                                                                                                                                                                                                                                                                                                                                                                                                                                                                                                                                                                                                                                                                                                                                                                                                                                                                                                                                                                                                                    |
|---------------------------------|--------------------------------------------------------------------------------------------------------------------------------------------------------------------------------------------------------------------------------------------------------------------------------------------------------------------------------------------------------------------------------------------------------------------------------------------------------------------------------------------------------------------------------------------------------------------------------------------------------------------------------------------------------------------------------------------------------------------------------------------------------------------------------------------------------------------------------------------------------------------------------------------------------------------------------------------------------------------------------------------------------------------------------------------------------------------------------------------------------------------------------------------------------------------------------------------------------------------------------------------------------------------------------------------------------------------------------------------------------------------------------------------------------------------------------------------------------------------------------------------------------------------|
|                                 | <ul style="list-style-type: none"> <li>▪ Chance of survival vs post-CA quality of life</li> <li>▪ Risk vs benefit of moving patient</li> <li>• Conflict             <ul style="list-style-type: none"> <li>○ Between family wishes/expectations and patient's best interests</li> <li>○ Between guidelines for dispatch team and patients' best interests</li> </ul> </li> </ul>                                                                                                                                                                                                                                                                                                                                                                                                                                                                                                                                                                                                                                                                                                                                                                                                                                                                                                                                                                                                                                                                                                                                   |
| Caring for the patient's family | <ul style="list-style-type: none"> <li>• Impact on family             <ul style="list-style-type: none"> <li>○ Feeling responsible for not doing good enough CPR</li> <li>○ Emotional trauma</li> <li>○ Regret over actions taken or not taken</li> <li>○ Feeling that they are responsible for the decision</li> </ul> </li> <li>• Communication with family             <ul style="list-style-type: none"> <li>○ Dealing with disagreement between family members</li> <li>○ Age causes a dilemma in communication with family</li> <li>○ Transparency</li> <li>○ Involving family in decision</li> <li>○ Use of language</li> <li>○ Designating a liaison</li> </ul> </li> <li>• Duty of care             <ul style="list-style-type: none"> <li>○ Empathy/compassion</li> <li>○ Family-witnessed resus</li> <li>○ Doing everything clinically for the family's sake</li> <li>○ Reducing the family's burden during the event</li> <li>○ Breaking bad news gradually</li> <li>○ Reducing distress to family</li> <li>○ Not giving false hope</li> <li>○ Family presence influencing decisions</li> <li>○ Facilitating closure</li> </ul> </li> <li>• Conflict             <ul style="list-style-type: none"> <li>○ Between caring for family and resus practicalities</li> <li>○ Between caring for family and guidelines</li> </ul> </li> <li>• Limits on caring for the family             <ul style="list-style-type: none"> <li>○ Prioritizing patient over others' (family's) needs</li> </ul> </li> </ul> |
| Impact on paramedics            | <ul style="list-style-type: none"> <li>• Risks to paramedics on scene             <ul style="list-style-type: none"> <li>○ High levels of stress</li> <li>○ Coping with upset family / bystanders</li> <li>○ Verbal and physical abuse from family / bystanders</li> <li>○ Distress of breaking bad news</li> </ul> </li> <li>• Risks to paramedics during transport</li> <li>• Risks to paramedics over time             <ul style="list-style-type: none"> <li>○ Emotional trauma</li> <li>○ Cynicism</li> <li>○ Complaints</li> </ul> </li> <li>• Judgment by hospital staff</li> <li>• Moral distress             <ul style="list-style-type: none"> <li>○ Values</li> </ul> </li> </ul>                                                                                                                                                                                                                                                                                                                                                                                                                                                                                                                                                                                                                                                                                                                                                                                                                       |

|                  |                                                                                                                                                                                                                                                                                                                                                                                                                                                                                                                                                                                                                                                                                                                                                                                                                                                                                                                                                                                                                                                                                                                                                                                                                                                                                                                                                                                                                                                                                                                                                                                                                                                                                               |
|------------------|-----------------------------------------------------------------------------------------------------------------------------------------------------------------------------------------------------------------------------------------------------------------------------------------------------------------------------------------------------------------------------------------------------------------------------------------------------------------------------------------------------------------------------------------------------------------------------------------------------------------------------------------------------------------------------------------------------------------------------------------------------------------------------------------------------------------------------------------------------------------------------------------------------------------------------------------------------------------------------------------------------------------------------------------------------------------------------------------------------------------------------------------------------------------------------------------------------------------------------------------------------------------------------------------------------------------------------------------------------------------------------------------------------------------------------------------------------------------------------------------------------------------------------------------------------------------------------------------------------------------------------------------------------------------------------------------------|
|                  | <ul style="list-style-type: none"> <li>▪ Duty to preserve life</li> <li>▪ Patient dignity</li> <li>○ Conflict             <ul style="list-style-type: none"> <li>• Between guidelines and what feels right</li> <li>• Between expert advice and what will benefit patient, bystanders, crew</li> </ul> </li> <li>○ Care for the clinical team             <ul style="list-style-type: none"> <li>▪ Minimising harm to paramedic by removing decision from them</li> <li>▪ Checking in and debriefing</li> </ul> </li> </ul>                                                                                                                                                                                                                                                                                                                                                                                                                                                                                                                                                                                                                                                                                                                                                                                                                                                                                                                                                                                                                                                                                                                                                                   |
| Decision-making  | <ul style="list-style-type: none"> <li>• Complexity of decisions             <ul style="list-style-type: none"> <li>○ PEA is complex – not an easy decision to terminate</li> <li>○ Decisions need to be defensible</li> <li>○ Difficulty of unpredictable cases</li> <li>○ Triangulation; patient, family, &amp; clinical info</li> <li>○ Decision making in OHCA is nuanced and complex</li> <li>○ Impact of organ donation on decision re CPR</li> <li>○ ED staff have more information on which to make a decision than paramedics</li> <li>○ Paramedics make decisions in stressful situations</li> </ul> </li> <li>• Responsibility / accountability             <ul style="list-style-type: none"> <li>○ Shared decision-making                 <ul style="list-style-type: none"> <li>▪ Making decision as a team</li> <li>▪ Protection for decision-maker</li> <li>▪ Advice from more expert clinicians</li> <li>▪ Paramedics need autonomy and support</li> <li>▪ Life /death decision-making needs to be shared</li> <li>▪ Confidence depends on experience</li> <li>▪ Negotiating authority within the team</li> </ul> </li> <li>○ Impact of guidelines versus clinician experience/autonomy</li> <li>○ Importance of acting to guideline</li> <li>○ Following one's instinct and taking responsibility</li> </ul> </li> <li>• External factors             <ul style="list-style-type: none"> <li>○ Importance of context                 <ul style="list-style-type: none"> <li>▪ Location of CA</li> <li>▪ Availability of necessary medical facilities</li> </ul> </li> <li>○ Difficulty of making complex decisions when tired at end of a long shift</li> </ul> </li> </ul> |
| Impact on others | <ul style="list-style-type: none"> <li>• Multiple stakeholders             <ul style="list-style-type: none"> <li>○ The right decision needs to be made for the patient, family and others</li> </ul> </li> <li>• Ambulance service             <ul style="list-style-type: none"> <li>○ Waste of resources if patient unlikely to survive</li> </ul> </li> </ul>                                                                                                                                                                                                                                                                                                                                                                                                                                                                                                                                                                                                                                                                                                                                                                                                                                                                                                                                                                                                                                                                                                                                                                                                                                                                                                                             |
